# Supplementary material
Source: Springer Nature journal article supplement (https://www.springermedizin.de/resource/supplementary/12888_2013_1511_MOESM3_ESM.pdf/9480606)

Plasma oxytocin – pg/ml

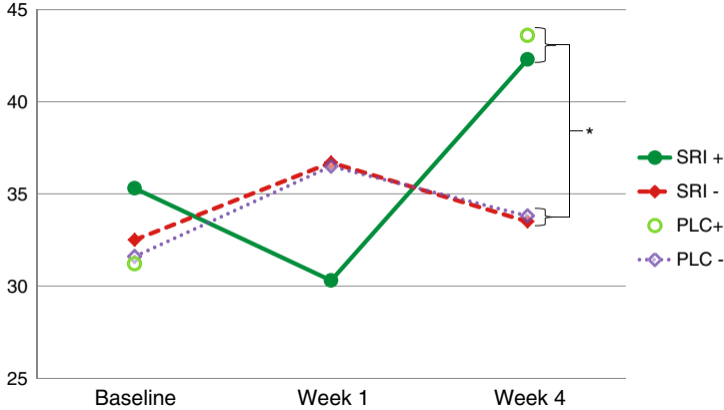

Supplement: MOESM3 [file 9480606]
